# Supplementary material for: Recapitulating human ovarian aging using random walks
Source: PeerJ journal article supplement (doi:10.7717/peerj.13941), 2022-08-22

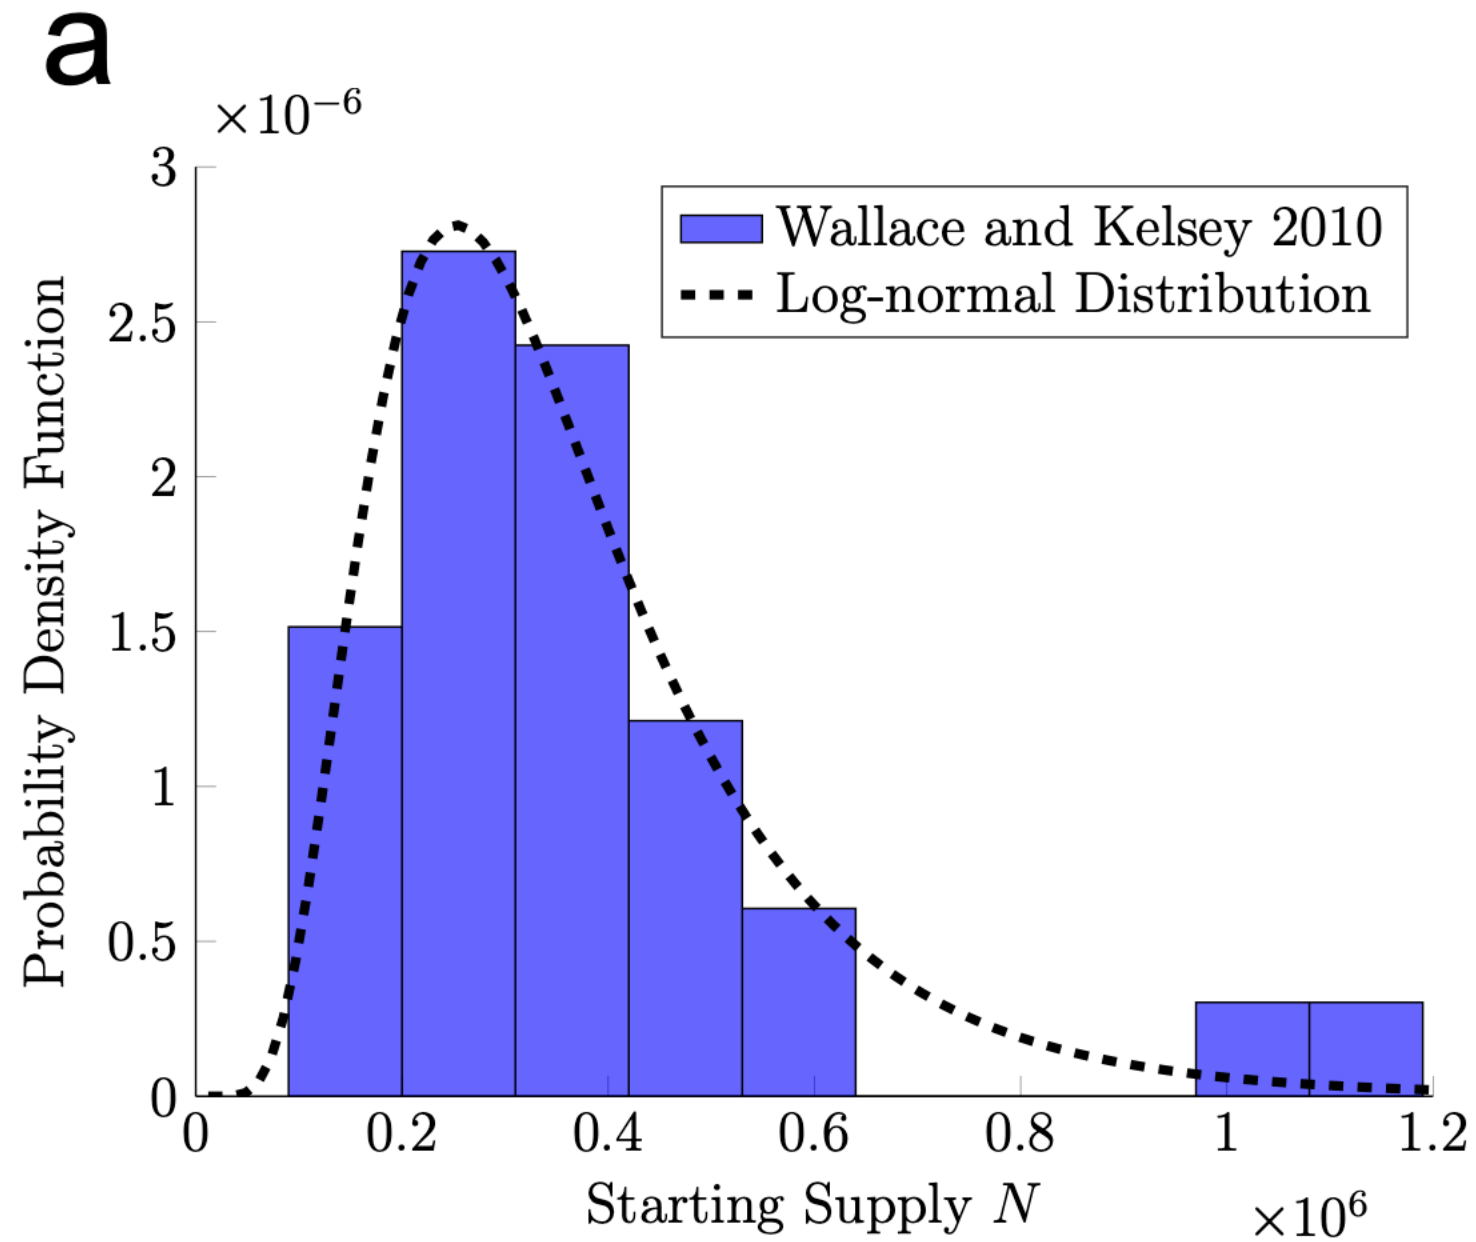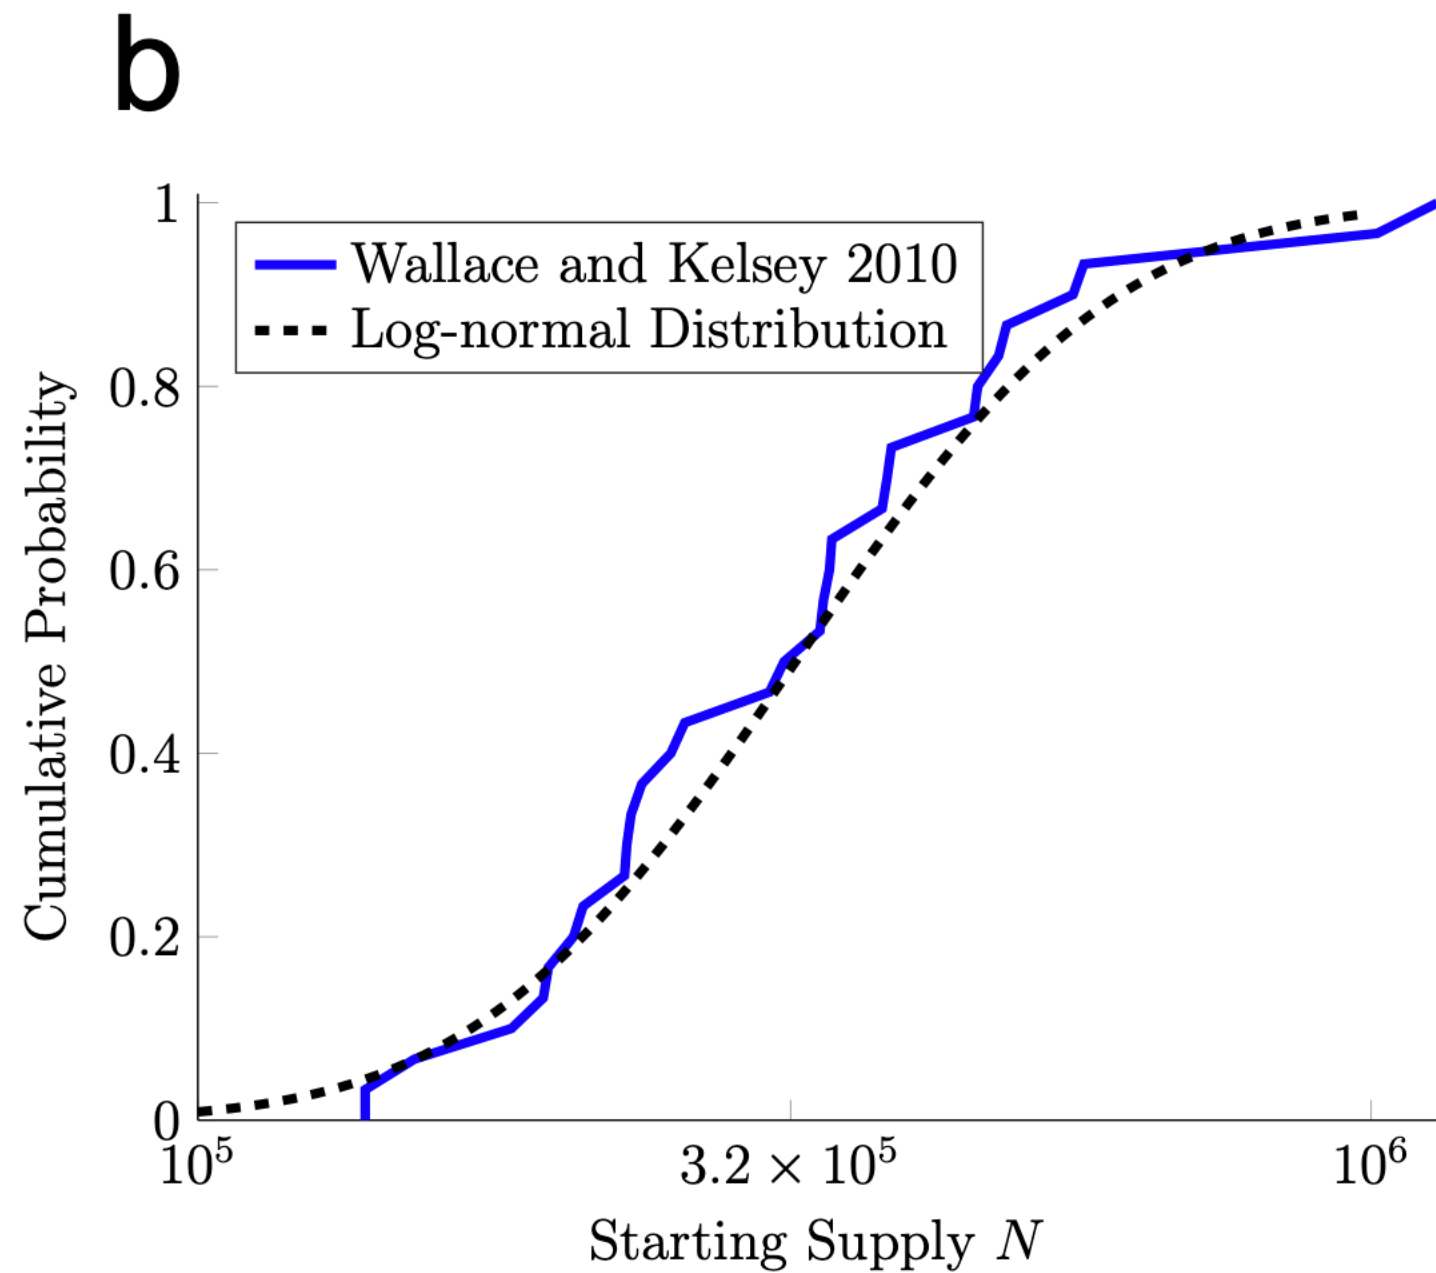

Supplement: FigS1_072822.pdf [file FigS1_072822.pdf]
