# Supplementary material for: Recapitulating human ovarian aging using random walks
Source: PeerJ journal article supplement (doi:10.7717/peerj.13941), 2022-08-22

## Drift Parameters (Corresponding Figure)

## ANM Histogram

Subject-Identical, Time-Invariant  
(Figure 2a)

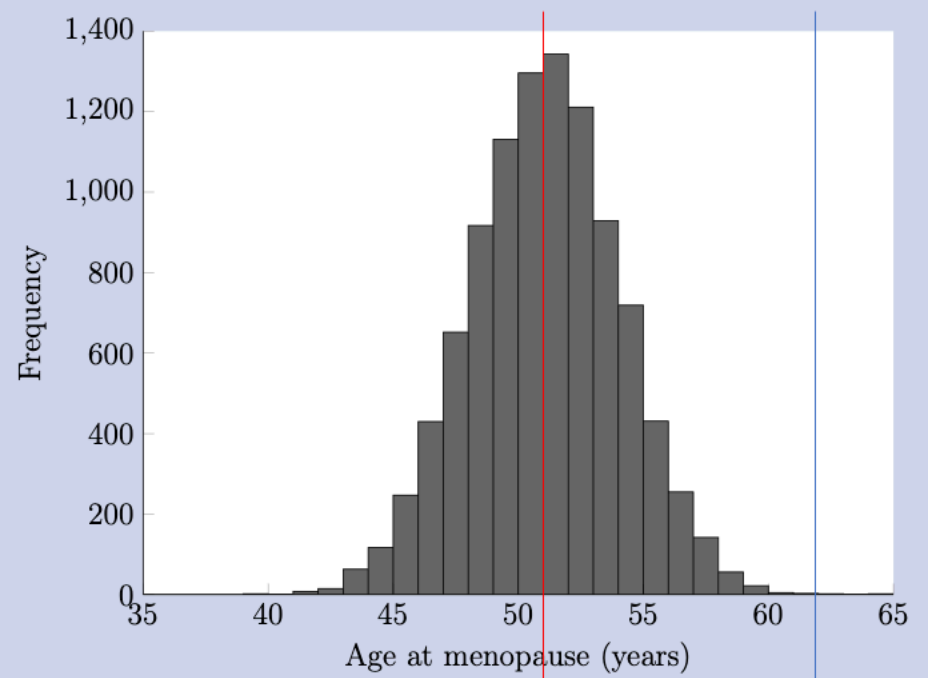

Subject-Variable, Time-Invariant  
(Figures 2b, 3a)

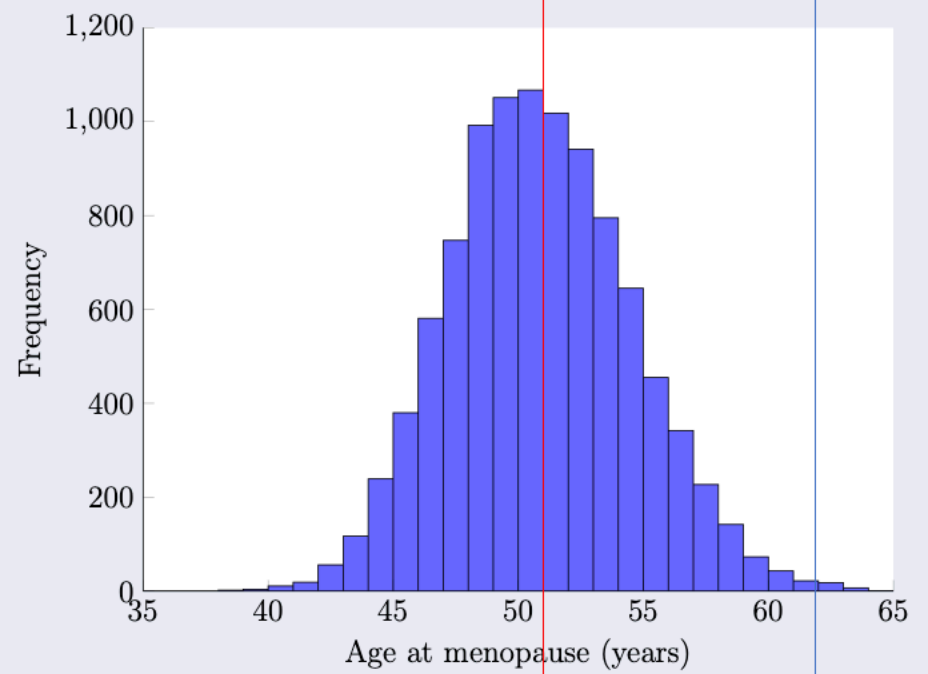

Subject-Variable, Time-Variant\*  
(Figure 3c)

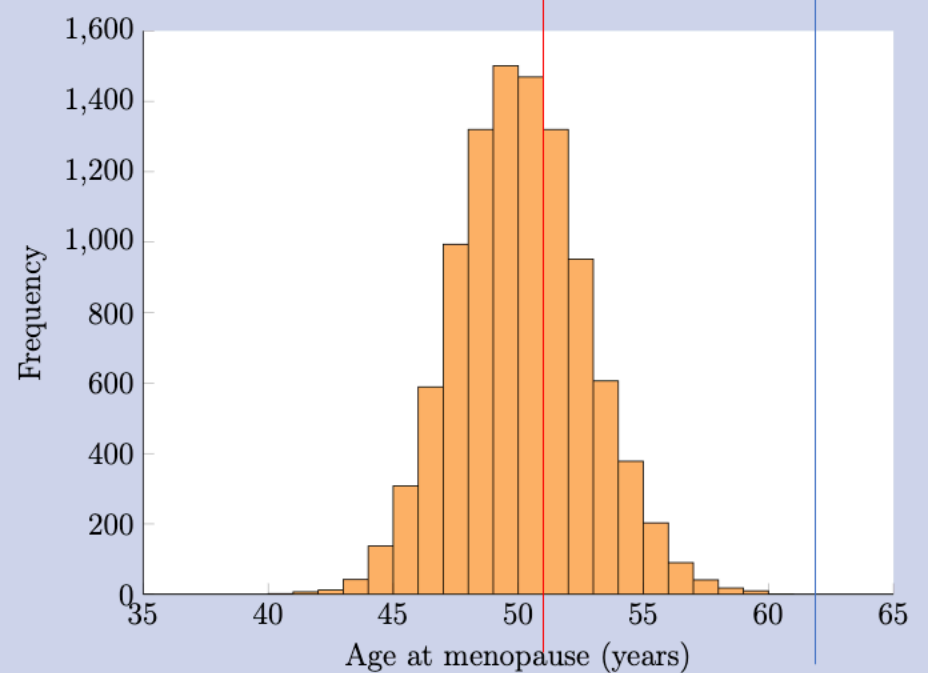

Supplement: FigS2_072822.pdf [file FigS2_072822.pdf]
