# Supplementary material for: Recapitulating human ovarian aging using random walks
Source: PubMed Central journal article supplement (PMC9406804; doi:10.7717/peerj.13941), 2022-08-22
Supplement: peerj-10-13941-s003.pdf [file peerj-10-13941-s003.pdf]

691 **APPENDIX**

692 Supplemental information in support of our mathematical modeling approach is provided as follows. We  
 693 first expand upon the alignment between continuous and discrete random walk models, then provide the  
 694 justification for treatment of PF starting supply as a log-normal distribution (Fig. S1), and finally provide  
 695 ANM simulation results as histograms for further consideration.

696 **DISCRETE AND CONTINUOUS RANDOM WALK MODELS**

697 We now show the equivalence of the discrete random walk in (1) and the continuous random walk in (2)  
 698 for small steps  $\Delta t$  and  $\Delta x$ . The discrete random walk in (1) can be written as

$$X((n+1)\Delta t) = X(n\Delta t) + \Delta x \xi_{n+1}, \quad n \geq 0, \quad (12)$$

699 where  $\{\xi_n\}_{n \geq 1}$  is an independent and identically distributed (iid) sequence of random variables with

$$\xi_n = \begin{cases} +1 & \text{with probability } p, \\ -1 & \text{with probability } 1 - p. \end{cases}$$

700 Defining  $D$  and  $V$  as in (3), the discrete random walk (12) can be written as

$$X((n+1)\Delta t) = X(n\Delta t) - V\Delta t + \sqrt{2D\Delta t} Z_{n+1}, \quad n \geq 0, \quad (13)$$

701 where

$$Z_n := \xi_n - 2p + 1, \quad n \geq 1.$$

702 Notice that  $\{Z_n\}_{n \geq 1}$  is an iid sequence with

$$\mathbb{E}[Z_n] = 0, \quad \text{Variance}(Z_n) = 4p(1-p).$$

703 If we take  $\Delta x \rightarrow 0$ ,  $\Delta t \rightarrow 0$ , and  $p \rightarrow 1/2$  while keeping  $D$  and  $V$  in (3) fixed, applying the functional  
 704 central limit theorem (Billingsley, 1995) to (13) yields that the discrete random walk  $\{X(n\Delta t)\}_{n \geq 0}$   
 705 converges in distribution to the continuous random walk  $\{X(t)\}_{t \geq 0}$  process satisfying the stochastic  
 706 differential equation in (2).

707 **Reserve exit time  $\tau$**

708 ***Exact probability distribution of  $\tau$***

709 For the continuous random walk  $\{X(t)\}_{t \geq 0}$  satisfying (2), the reserve exit time  $\tau$  is the first time that the  
 710 random walk leaves the interval  $(0, L)$ . Mathematically, this is denoted by

$$\tau := \inf\{t > 0 : X(t) \notin (0, L)\}. \quad (14)$$

711 Define the survival probability,

$$S(x, t) := \mathbb{P}(\tau > t | X(0) = x),$$

712 where we have conditioned on the initial position of the random walk. The survival probability  $S(x, t)$  is  
 713 the unique solution of the following backward Kolmogorov equation (Gardiner, 2009),

$$\frac{\partial}{\partial t} S = D \frac{\partial^2}{\partial x^2} S - V \frac{\partial}{\partial x} S, \quad x \in (0, L), t > 0, \quad (15)$$

714 with absorbing Dirichlet boundary conditions,  $S(0, t) = S(L, t) = 0$ , and unit initial condition  $S(x, 0) = 1$ .

715 In order to solve for  $S(x, t)$ , we first define the solution operator for the partial differential equation  
 716 in (23) subject to absorbing boundary conditions in the special case that  $V = 0$  by  $\Phi^t(q)$ . That is,  $\Phi^t$   
 717 is a linear operator that takes an initial condition,  $q(x)$ , and maps it to the solution of (23) with  $V = 0$   
 718 subject to absorbing boundary conditions at time  $t > 0$ . It is straightforward to solve for  $\Phi^t$  explicitly via  
 719 a standard separation of variables calculation and find

$$(\Phi^t(q))(x) = \sum_{k=1}^{\infty} \langle \phi_k, q \rangle e^{-v_k t} \phi_k(x), \quad (16)$$

720 where the eigenvalues,  $\{v_k\}_{k \geq 1}$ , and orthonormal eigenfunctions,  $\{\phi_k\}_{k \geq 1}$ , are given by

$$v_k = \frac{Dk^2\pi^2}{L^2}, \quad \phi_k(x) = \sqrt{\frac{2}{L}} \sin\left(\frac{k\pi x}{L}\right), \quad (17)$$

721 and  $\langle \cdot, \cdot \rangle$  denotes the inner product,

$$\langle f, g \rangle := \int_0^L f(x)g(x) dx.$$

722 It follows that

$$S(x, t) = e^{\frac{V}{2D}x} e^{-\frac{V^2}{4D}t} \Phi^t(e^{-\frac{V}{2D}x}). \quad (18)$$

723 To make (18) explicit, we first calculate the inner product

$$\begin{aligned} \langle \phi_k(x), e^{-\frac{V}{2D}x} \rangle &= \int_0^L e^{-\frac{V}{2D}x} \sqrt{\frac{2}{L}} \sin\left(\frac{k\pi x}{L}\right) dx \\ &= \frac{4\sqrt{2}\pi D^2 k \sqrt{L} \left(1 - (-1)^k e^{-\frac{LV}{2D}}\right)}{4\pi^2 D^2 k^2 + L^2 V^2}, \quad k \geq 1. \end{aligned}$$

724 Therefore, (16) and (18) imply

$$S(x, t) = \sum_{k=1}^{\infty} A_k e^{-\lambda_k t}, \quad (19)$$

725 where

$$\begin{aligned} \lambda_k &:= \frac{Dk^2\pi^2}{L^2} + \frac{V^2}{4D} \\ A_k &:= \frac{4\sqrt{2}\pi D^2 k \sqrt{L} \left(1 - (-1)^k e^{-\frac{LV}{2D}}\right)}{4\pi^2 D^2 k^2 + L^2 V^2} e^{\frac{V}{2D}x} \sqrt{\frac{2}{L}} \sin\left(\frac{k\pi x}{L}\right), \quad k \geq 1. \end{aligned}$$

### 726 **Growth and death probabilities**

727 In our model, a PF begins to grow if its ISR activity hits the growth threshold at  $X = 0$  and it dies before  
728 beginning to grow if its ISR activity hits the death threshold at  $X = L > 0$ . For the parameter values in (6),  
729 the vast majority of PFs grow rather than die.

730 To study this quantitatively, define

$$\begin{aligned} \tau_0 &:= \{t > 0 : X(t) = 0\}, \\ \tau_L &:= \{t > 0 : X(t) = L\}. \end{aligned}$$

731 In words,  $\tau_0$  is the first time the random walk reaches 0, and  $\tau_L$  is the first time the random walk reaches  
732  $L$ . Note that the reserve exit time  $\tau$  in (14) is thus the minimum of  $\tau_0$  and  $\tau_L$ . Hence, a PF dies before  
733 beginning to grow if  $\tau_0 > \tau_L$  (i.e. if its ISR activity hits the death threshold at  $X = L$  before the growth  
734 threshold at  $X = 0$ ).

735 Define the probability that a PF dies before beginning to grow,

$$u(x) := \mathbb{P}(\tau_0 > \tau_L | X(0) = x), \quad (20)$$

736 where we have conditioned on the initial ISR activity,  $X(0) = x$ . The probability  $u(x)$  satisfies Gardiner  
737 (2009)

$$0 = D \frac{d^2}{dx^2} u - V \frac{d}{dx} u, \quad x \in (0, L),$$

738 with boundary conditions  $u(0) = 0$  and  $u(L) = 1$ . It is straightforward to check that the unique solution to  
739 this boundary value problem is

$$u(x) = \frac{e^{-\frac{V(L-x)}{D}} - e^{-\frac{VL}{D}}}{1 - e^{-\frac{VL}{D}}}. \quad (21)$$

740 Evaluating (21) at the parameter values in (6) yields

$$u(x) = 2.05 \times 10^{-6}. \quad (22)$$

741 **Approximate probability distribution of  $\tau$**

742 We have found that the vast majority of PFs hit the growth threshold before the death threshold. This  
 743 suggests that we can approximate the probability distribution of  $\tau$  by ignoring the death threshold. To  
 744 study this case, define the survival probability,

$$S_0(x, t) := \mathbb{P}(\tau_0 > t | X(0) = x).$$

745 The survival probability  $S_0(x, t)$  is the unique solution of the following backward Kolmogorov equa-  
 746 tion, (Gardiner, 2009)

$$\begin{aligned} \frac{\partial}{\partial t} S_0 &= D \frac{\partial^2}{\partial x^2} S_0 - V \frac{\partial}{\partial x} S_0, & x > 0, t > 0, \\ S_0 &= 0, & x = 0, \\ S_0 &= 1, & t = 0. \end{aligned} \tag{23}$$

747 A straightforward calculus exercise verifies that

$$S_0(x, t) = \frac{1}{2} \left[ 1 + \operatorname{erf}\left(\frac{x - Vt}{\sqrt{4Dt}}\right) - e^{Vx/D} \left( 1 - \operatorname{erf}\left(\frac{x + Vt}{\sqrt{4Dt}}\right) \right) \right]$$

748 satisfies (23). Equation (7) then follows from (4) upon setting  $x = 1$ .

749 For the values of  $V$  and  $D$  in (6) with  $x = 1$  and  $L \geq 2$ , the solution  $S(x, t)$  is well-approximated by  
 750  $S_0(x, t)$ . Again, the basic reason is that for these parameter values, it is very unlikely for a PF to hit the  
 751 death threshold at  $L$  before the growth threshold at 0. To make this precise, observe that

$$\begin{aligned} \mathbb{P}(\tau_0 > t) &= \mathbb{P}(\tau_0 > t, \tau_L > \tau_0) + \mathbb{P}(\tau_0 > t, \tau_0 > \tau_L) \\ &\leq \mathbb{P}(\tau_0 > t, \tau_L > t) + \mathbb{P}(\tau_0 > \tau_L) \\ &= \mathbb{P}(\tau > t) + \mathbb{P}(\tau_0 > \tau_L). \end{aligned}$$

752 Therefore,

$$0 \leq \mathbb{P}(\tau_0 > t) - \mathbb{P}(\tau > t) \leq \mathbb{P}(\tau_0 > \tau_L). \tag{24}$$

753 By definition of  $S$  and  $S_0$ , the bound (24) implies

$$0 \leq S_0(x, t) - S(x, t) \leq u(x), \tag{25}$$

754 where  $u(x)$  is the probability in (20). Evaluating  $u(x)$  at the parameter values in (6) as in (22), we obtain

$$0 \leq S_0(x, t) - S(x, t) \leq 2.05 \times 10^{-6}.$$

755 **Starting supply distribution**

756 We model the distribution of the starting supply  $N$  across a population of women as a log-normal  
 757 distribution as in (8)-(9). The parameters  $\mu$  and  $\sigma$  in (8) are the respective mean and standard deviation  
 758 of the natural logarithm of the 30 PF counts in Wallace and Kelsey (2010) taken from women who were  
 759 at least 6 months gestation and at most one month post birth. In Figure S1a, we plot the histogram of  
 760 these 30 PF counts (blue bars), which is well-approximated by the probability density function of the  
 761 log-normal distribution in (9) with  $\mu$  and  $\sigma$  in (8) (dashed black curve). In Figure S1b, we plot the  
 762 corresponding empirical cumulative distribution function for these 30 PF counts (solid blue curve) and  
 763 the cumulative distribution function of the log-normal distribution in (8)-(9) (dashed black curve). The  
 764 Kolmogorov-Smirnov distance between these two distributions in Figure S1b (i.e. the maximum absolute  
 765 difference) is only 0.1, which has a corresponding p-value of 0.88 for the null hypothesis that these 30 PF  
 766 counts are indeed sampled from the log-normal distribution in (8)-(9).

767 For starting supply, we chose to consider women who were within a few months of birth since only 15  
 768 PF counts in Wallace and Kelsey (2010) were from women at birth. However, considering only these 15  
 769 PF counts at birth would have little effect on our results, and would only change the values  $\mu = 12.686$ ,  
 770  $\sigma = 0.497$  in (8) to  $\mu = 12.801$ ,  $\sigma = 0.490$ .

771 **SUPPLEMENTAL FIGURES**

772 Supplemental information in support of our mathematical modeling approach is provided as follows. First,  
773 we show how PF starting supply was determined according to the distribution of PF numbers around the  
774 time of birth produced by Wallace and Kelsey (2010) (Fig. S1).

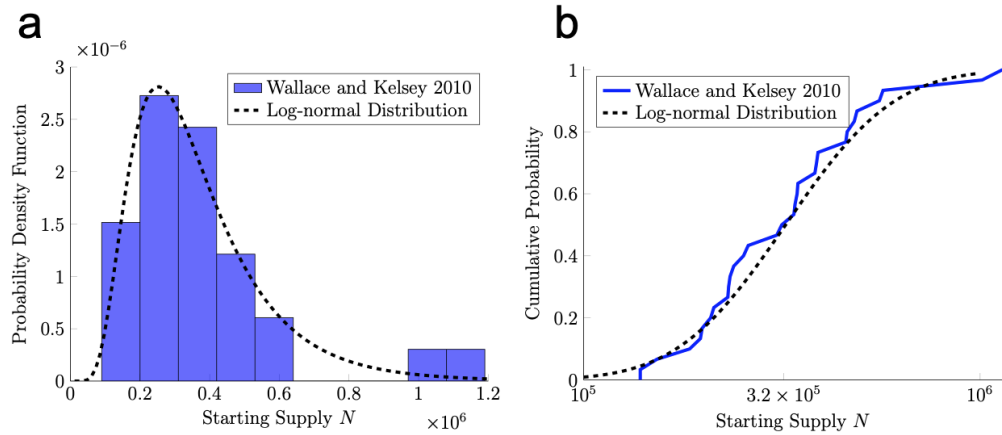

775

**Appendix 1, Figure S1.** Starting supply distribution. In panel a, we plot a histogram of the 30 PF counts for women near birth reported by Wallace and Kelsey (2010) (blue bars), which is well-approximated by the log-normal distribution in (8)-(9) (dashed black curve). In panel b, we provide a cumulative distribution function plot of observed PF counts (blue solid line) versus the log-normal distribution (dashed black curve).

776

777 ANM histograms in Fig. S2 correspond to data shown in Figures 1 and 2, with model conditions  
 778 indicated by Figure panel.

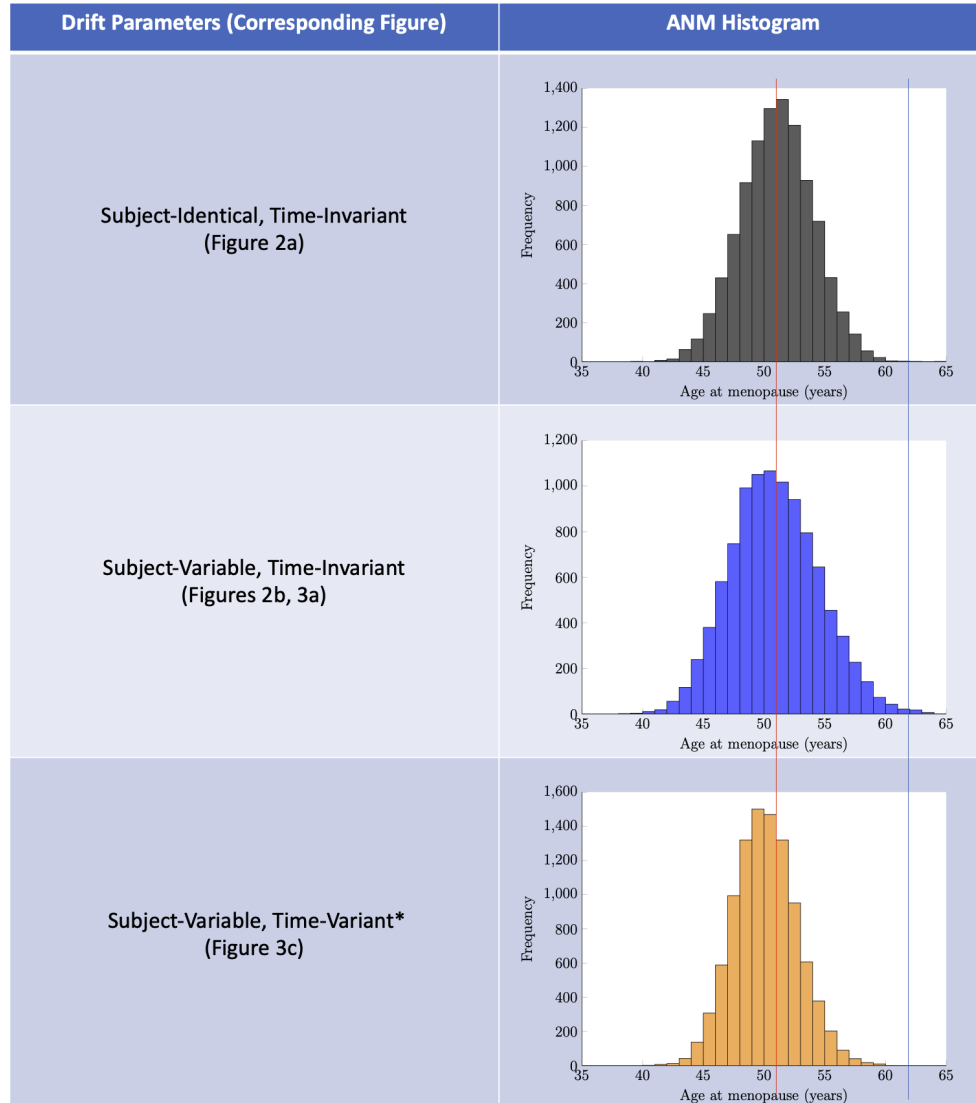

779

**Appendix 1, Figure S2.** ANM histograms generated from RW output when drift was set as specified in "Drift Parameters" column. As shown, an ANM distribution centered around a median age of approximately 51 (red vertical line) can be produced in each case, with few simulated subjects reaching menopause before 40 years and after 60 years. Time-Variant drift indicated by the asterisk (\*) was applied by modifying drift conditions and also applying a single step drift acceleration in year 38 of simulation time. This was used to interrogate the possibility that PF loss accelerates during reproductive aging. Note that here, the ANM distribution generated when Subject-Variable drift is applied (middle panel) is broader than that seen for homogenous drift (top panel) given otherwise identical model conditions. Application of Time-Variant drift resulted again in a narrower ANM distribution, and prevented simulated subjects from reaching the ANM threshold after age 62 (blue vertical line).

780
